# Supplementary material for: Evolutionary relationships and population genetics of the Afrotropical leaf-nosed bats (Chiroptera, Hipposideridae)
Source: PubMed Central journal article supplement (PMC7197329; doi:10.3897/zookeys.929.50240), 2020-04-22

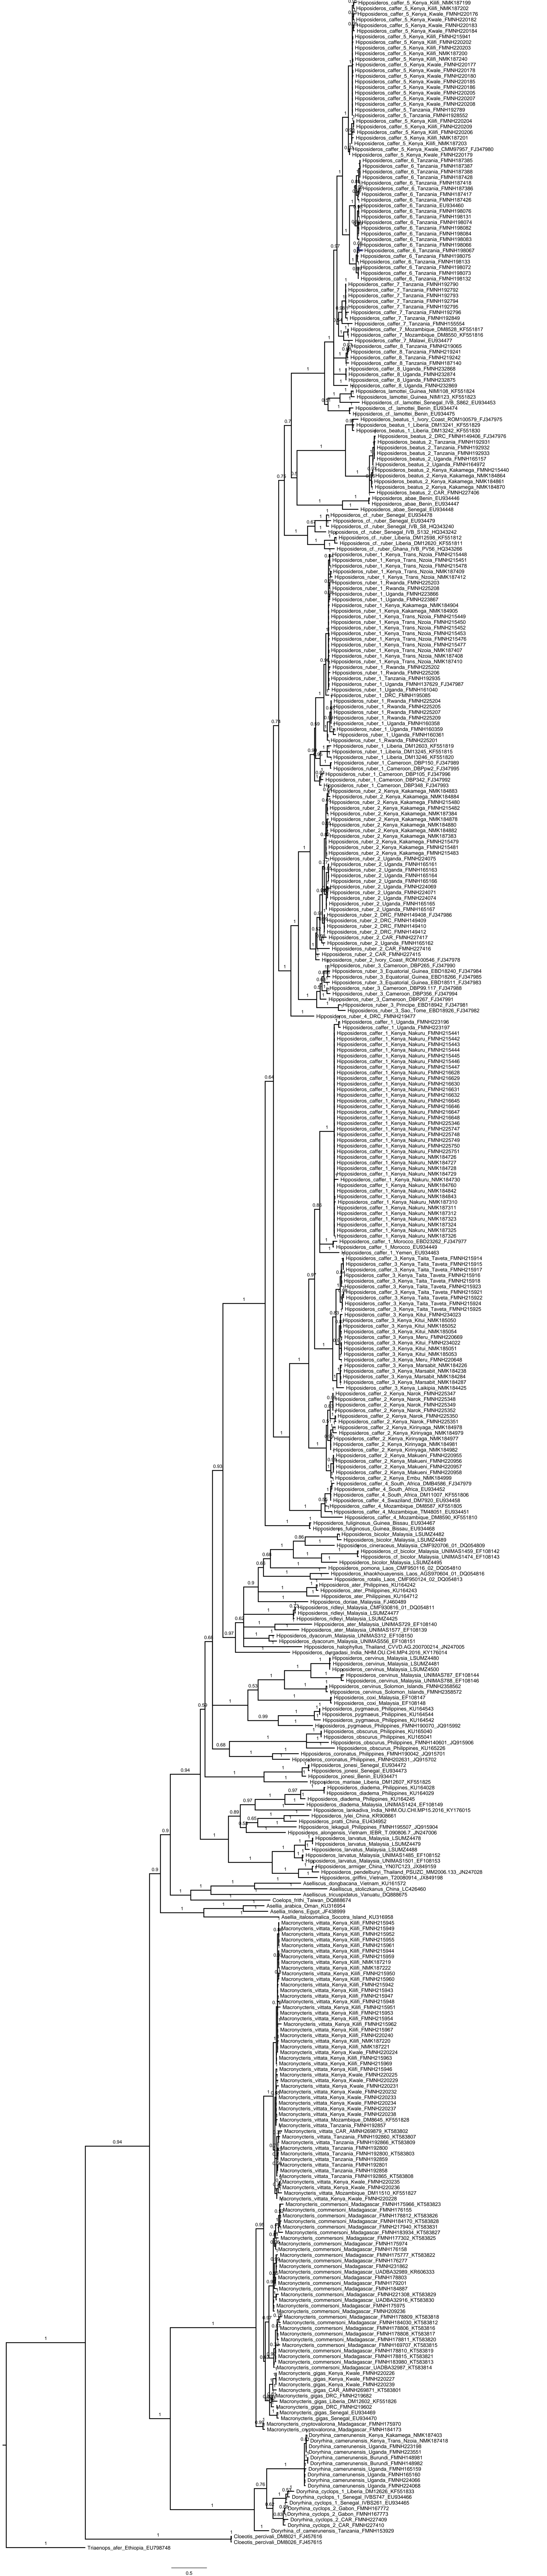

Supplement: zookeys-929-117-s003.pdf [file zookeys-929-117-s003.pdf]
